# Supplementary material for: Impact of Pre-Analytical and Analytical Variables Associated with Sample Preparation on Flow Cytometric Stainings Obtained with EuroFlow Panels
Source: MDPI journal article supplement (doi:10.3390/cancers14030473), 2022-01-18
Supplement: s1 [file s1]

## **Supplementary materials**

### **S1. Sample preparation protocol for evaluation of OneFlow kits (BD)**

Sample preparation:

1. Pipette 300µL of the sample into a 15mL conical tube
2. Add 10mL PBS + 0.5% BSA + 0.1% NaN<sub>3</sub>. Vortex for 30 seconds.
3. Centrifuge for 5 minutes at 540g.
4. Remove as much supernatant as possible using a Pasteur pipette or vacuum system.
5. Resuspend the cell pellet before adding more wash buffer
6. Repeat steps 2-5 two more times for a total of 3 washes.
7. Resuspend the cell pellet in 100µL of PBS + 0.5% BSA + 0.1% NaN<sub>3</sub>.

Staining Protocol for the LST tube:

1. Add 100µL of washed blood to the dry OneFlow LST tube. Vortex for 3 seconds.
2. Incubate for 30 minutes at room temperature (RT), protected from light.
3. Add 2mL of 1x FACS Lysing Solution. Vortex for 3 seconds.
4. Incubate for 10 minutes at RT protected from light.
5. Centrifuge for 5 minutes at 540g.
6. Discard the supernatant using a Pasteur pipette or vacuum system without disturbing the cell pellet.
7. Add 2mL of PBS + 0.5% BSA + 0.1% NaN<sub>3</sub> to the cell pellet. Vortex for 3 seconds.
8. Centrifuge for 5 minutes at 540 g.
9. Discard the supernatant using a Pasteur pipette or vacuum system without disturbing the cell pellet.
10. Resuspend the cell pellet in 200µL PBS + 0.5% BSA + 0.1% NaN<sub>3</sub>.
11. Acquire stained samples at the times set based on the specific experimental schedules.

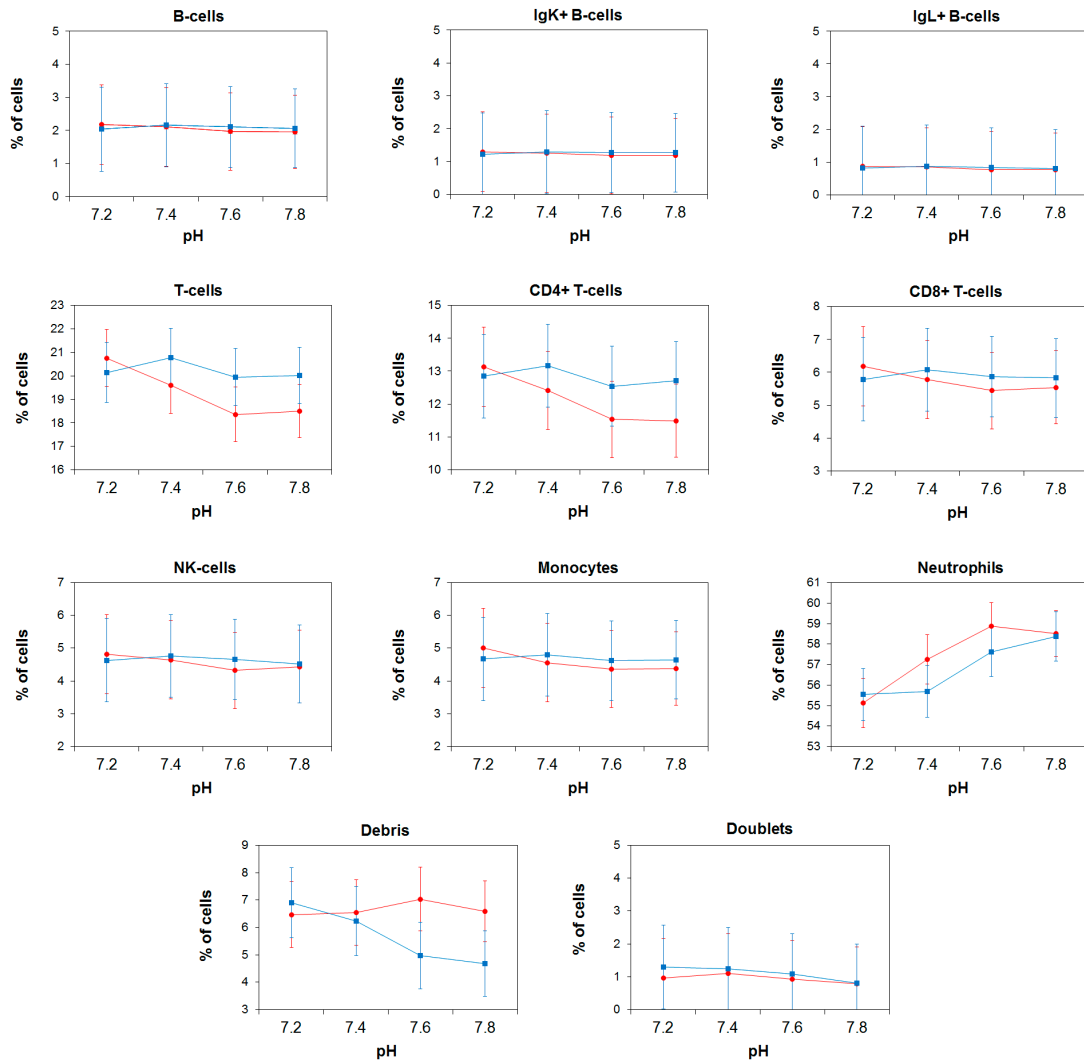

**Supplementary Figure S1.** Impact of different BSA concentrations (0.2% - red lines vs 0.5% - blue lines) and different pH of the washing buffer on the relative percentage distribution of different cell populations identifiable in normal PB samples with LST (n=20). The whiskers span between  $\pm 1$ SD value of the mean values.

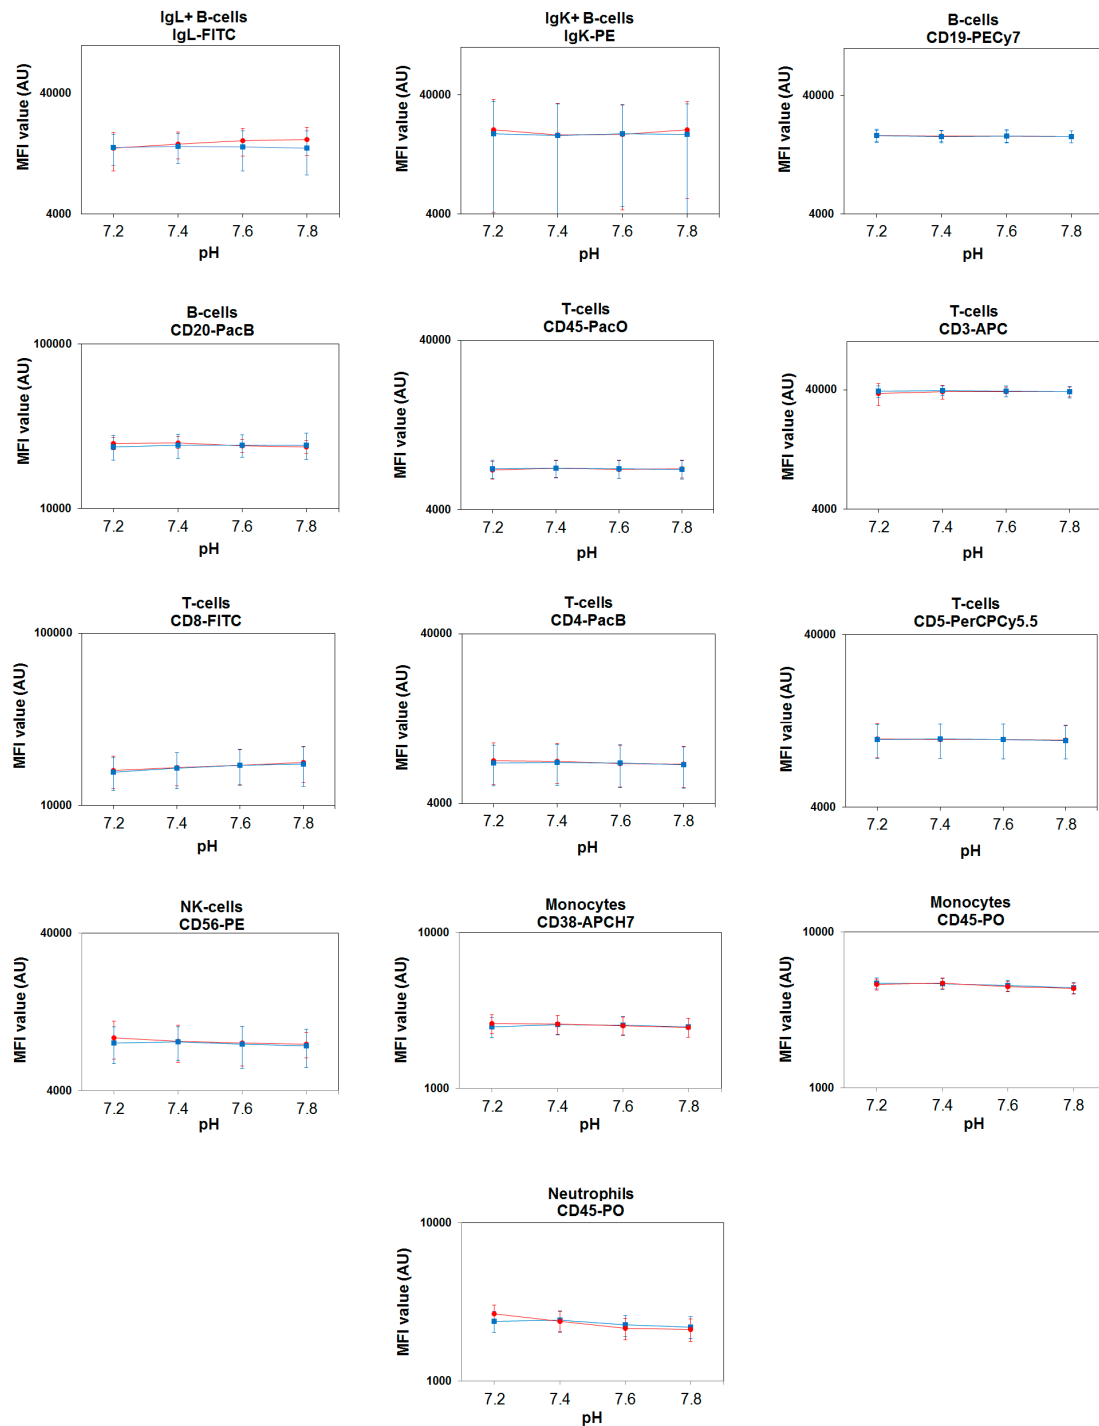

**Supplementary Figure S2.** Impact of different BSA concentrations (0.2% - red lines vs 0.5% - blue lines) and different pH of the washing buffer on the expression levels of individual LST markers as assessed on different cell populations in normal PB samples (n=20). The whiskers span between  $\pm 1SD$  value of the mean values. APC – allophycocyanin, APC-H7 – allophycocyanin-Hilite 7, FITC – fluorescein isothiocyanate, PacB – Pacific Blue, PE – phycoerythrin, PECy7 – phycoerythrin-cyanine 7, PerCPCy5.5 – peridinin-chlorophyll-cyanine-5.5, PO – Pacific Orange

**Supplementary Table S1.** Detailed information on the antibody reagents used in the current study, including the antibody titer used per test.

| Marker | Fluorochrome | Manufacturer    | Clone   | Catalogue reference      | Staining volume (µl/test) | EuroFlow panel (J. J.M. Van Dongen et al. 2012) |
|--------|--------------|-----------------|---------|--------------------------|---------------------------|-------------------------------------------------|
| CD2    | PacB         | Biologend       | TS1/8   | 309216                   | 1                         | NK-CLPD                                         |
| CD2    | PECy7        | BD              | S5.2    | 335821                   | 2                         | T-CLPD                                          |
| CD3    | APC          | BD              | SK7     | 345767                   | 2.5                       | LST, B-CLPD                                     |
| CD3    | APCH7        | BD              | SK7     | 641415                   | 3                         | ALOT                                            |
| CD3    | PacB         | BD              | UCHT1   | 558117                   | 7                         | ALOT (cy)                                       |
| CD3    | PerCPCy5.5   | BD              | SK7     | 332771                   | 10                        | T-CLPD, NK-CLPD                                 |
| CD4    | PacB         | Biologend       | RPA-T4  | 300521                   | 0.5                       | LST, B-CLPD, T-CLPD                             |
| CD5    | APC          | BD              | L17F12  | 345783                   | 2.5                       | NK-CLPD                                         |
| CD5    | FITC         | BD              | L17F12  | 345781                   | 10                        | T-CLPD                                          |
| CD5    | PerCPCy5.5   | BD              | L17F12  | 341109                   | 15                        | LST, B-CLPD                                     |
| CD7    | APC          | eBioscience     | 124-1D1 | 17-0079-42               | 2                         | ALOT                                            |
| CD7    | FITC         | BD              | 4H9     | 347483                   | 10                        | T-CLPD, NK-CLPD                                 |
| CD8    | APCH7        | BD              | SK1     | 641400                   | 5                         | T-CLPD                                          |
| CD8    | FITC         | Cytognos        | UCHT4   | CYT-SLPC-50              | 20 (part of LST)          | LST, B-CLPD                                     |
| CD9    | PacB         | Exbio           | MEM-61  | PB-208-T100              | 4                         | BCP-ALL                                         |
| CD10   | APC          | BD              | HI10A   | 332777                   | 5                         | BCP-ALL                                         |
| CD10   | PE           | Beckman Coulter | ALB1    | A07760                   | 20                        | B-CLPD                                          |
| CD10   | APCH7        | BD              | HI10a   | EU: 655404<br>US: 655426 | 5                         | AML                                             |
| CD11b  | APC          | BD              | D12     | 333143                   | 5                         | AML                                             |
| CD11c  | APC          | BD              | S-HCL-3 | 333144                   | 2                         | T-CLPD, NK-CLPD                                 |
| CD11c  | PerCPCy5.5   | BD              | B-Ly6   | 658330                   | 10                        | B-CLPD                                          |
| CD13   | PE           | BD              | L138    | 347406                   | 7                         | BCP-ALL, AML                                    |
| CD15   | FITC         | BD              | MMA     | 332778                   | 10                        | BCP-ALL                                         |
| CD16   | PacB         | Biologend       | 3G8     | 302032                   | 5                         | NK-CLPD                                         |
| CD16   | PECy7        | BD              | 3G8     | 557744                   | 2                         | T-CLPD                                          |
| CD19   | APCH7        | BD              | SJ25C1  | 641395                   | 5                         | NK-CLPD                                         |
| CD19   | PECy7        | Beckman Coulter | J3-119  | IM3628                   | 5                         | ALOT, LST, BCP-ALL, PCD, B-CLPD                 |
| CD20   | PacB         | Biologend       | 2H7     | 302320                   | 1                         | LST, BCP-ALL, B-CLPD                            |
| CD21   | PacB         | Exbio           | LT21    | PB-306-T100              | 4                         | BCP-ALL                                         |
| CD22   | APC          | BD              | S-HCL-1 | 333145                   | 5                         | BCP-ALL                                         |
| CD22   | PerCPCy5.5   | BD              | S-HCL-1 | 658329                   | 25                        | B-CLPD                                          |
| CD23   | FITC         | Dako            | MHM6    | F7062                    | 2.5                       | B-CLPD                                          |
| CD24   | APCH7        | BD              | ML5     | EU: 658331               | 5                         | BCP-ALL                                         |
| CD25   | PE           | BD              | 2A3     | 341011                   | 10                        | T-CLPD, NK-                                     |

|        |            |                 |                |                                |                     |                                                                |
|--------|------------|-----------------|----------------|--------------------------------|---------------------|----------------------------------------------------------------|
| CD26   | PE         | BD              | L272           | 340423                         | 10                  | CLPD<br>T-CLPD, NK-<br>CLPD                                    |
| CD27   | APC        | BD              | L128           | 337169                         | 2.5                 | B-CLPD                                                         |
| CD27   | FITC       | BD              | L128           | 340424                         | 10                  | T-CLPD                                                         |
| CD27   | PerCPCy5.5 | BD              | L128           | EU:<br>656643<br>US:<br>655429 | 20                  | PCD                                                            |
| CD28   | APC        | BD              | CD28.2         | 559770                         | 10                  | T-CLPD                                                         |
| CD28   | PE         | BD              | L293           | 348047                         | 20                  | PCD                                                            |
| CD30   | PE         | BD              | BerH8          | 550041                         | 10                  | T-CLPD                                                         |
| CD31   | FITC       | BD              | WM59           | 555445                         | 10                  | B-CLPD                                                         |
| CD33   | PE         | BD              | P67.6          | 345799                         | 5                   | BCP-ALL                                                        |
| CD34   | PerCPCy5.5 | BD              | 8G12           | 347222                         | 10                  | ALOT, BCP-<br>ALL, AML                                         |
| CD38   | APCH7      | BD              | HB7            | EU:<br>656646<br>US:<br>653314 | 3                   | LST, BCP-ALL,<br>B-CLPD                                        |
| CD38   | FITC       | Cytognos        | LD38           | CYT-38F                        | 3*                  | PCD                                                            |
| CD38   | pure       | Cytognos        | LD38           | CYT-38P1                       | 2*                  | PCD                                                            |
| CD39   | PE         | BD              | TÜ66           | 555464                         | 10                  | B-CLPD                                                         |
| CD43   | APCH7      | BD              | IG10           | EU:<br>655407<br>US:<br>655430 | 2.5                 | B-CLPD                                                         |
| CD45   | PacB       | Dako            | T29/33         | PB986                          | 5                   | PCD                                                            |
| CD45   | PacO       | Invitrogen      | HI30           | MHCD453<br>0                   | 5                   | ALOT, LST,<br>BCP-ALL, AML,<br>B-CLPD, T-<br>CLPD, NK-<br>CLPD |
| CD45RA | APC        | BD              | HI100          | 550855                         | 10                  | T-CLPD                                                         |
| CD45RO | PECy7      | BD              | UCHL1          | 337168                         | 2                   | T-CLPD                                                         |
| CD49d  | APCH7      | BD              | 9F10           | EU:<br>658332                  | 1                   | B-CLPD                                                         |
| CD56   | PE         | Cytognos        | C5.9           | CYT-56PE                       | 5                   | PCD                                                            |
| CD56   | PE         | Cytognos        | C5.9           | CYT-<br>SLPC-50                | 20 (Part<br>of LST) | LST, B-CLPD                                                    |
| CD56   | PECy7      | Beckman Coulter | N901           | A21692                         | 5                   | NK-CLPD, T-<br>ALL                                             |
| CD57   | FITC       | BD              | HNK-1          | 333169                         | 10                  | T-CLPD, NK-<br>CLPD                                            |
| CD58   | FITC       | BD              | 1C3            | 555920                         | 7                   | BCP-ALL                                                        |
| CD62L  | FITC       | BD              | SK11           | 347443                         | 2.5                 | B-CLPD                                                         |
| CD65   | FITC       | Beckman Coulter | 88H7           | IM1654U                        | 7                   | BCP-ALL                                                        |
| CD66c  | PE         | Beckman Coulter | KOR-<br>SA3544 | IM2357U                        | 10                  | BCP-ALL                                                        |
| CD79a  | PE         | Dako            | HM57           | R7159                          | 5                   | ALOT (cy)                                                      |
| CD79b  | PerCPCy5.5 | BD              | SN8            | 656644                         | 10                  | B-CLPD                                                         |
| CD81   | APCH7      | BD              | JS-81          | EU:<br>655410<br>US:<br>655434 | 5                   | PCD, BCP-ALL,<br>B-CLPD                                        |
| CD94   | APC        | BD              | HP-3D9         | 559876                         | 5                   | T-CLPD, NK-                                                    |

|            |            |                 |                         |                                |                  |                              |
|------------|------------|-----------------|-------------------------|--------------------------------|------------------|------------------------------|
| CD95       | PE         | BD              | DX2                     | 555674                         | 20               | CLPD                         |
| CD103      | FITC       | BD              | Ber-ACT8                | 333155                         | 2                | B-CLPD                       |
| CD117      | PECy7      | Beckman Coulter | 104D2D1                 | EU:<br>B49221<br>US:<br>IM3698 | 5                | AML                          |
| CD117      | APC        | BD              | 104D2                   | 333233                         | 5                | PCD, BCP-ALL                 |
| CD123      | APC        | Miltenyi Biotec | AC145                   | 130-090-901                    | 7                | BCP-ALL                      |
| CD138      | PacO       | Exbio           | B-A38                   | PO-520                         | 4                | PCD                          |
| CD185      | APC        | R&D Systems     | 51505                   | FAB190A                        | 10               | B-CLPD                       |
| CD197      | PE         | eBioscience     | 3D12                    | 12-1979                        | 10               | T-CLPD                       |
| CD200      | APC        | eBioscience     | OX104                   | 17-9200                        | 1.25             | B-CLPD                       |
| CD279      | PE         | BD              | MIH4                    | 557946                         | 20               | T-CLPD                       |
| CD305      | PE         | BD              | DX26                    | 550811                         | 10               | B-CLPD                       |
| β2micro    | PerCPCy5.5 | BD              | Tü99                    | EU:<br>656645<br>US:<br>655435 | 15               | PCD                          |
| Granzyme B | PE         | Sanquin         | CLB-GB11                | M2289                          | 15               | T-CLPD (cy),<br>NK-CLPD (cy) |
| HLADR      | PacB       | BioLegend       | L243                    | 307624                         | 1 (1:5 dilution) | AML, NK-CLPD                 |
| HLADR      | PECy7      | BD              | L243                    | 335830                         | 2.5              | T-CLPD                       |
| HLADR      | PerCPCy5.5 | BD              | L243                    | 552764                         | 10               | B-CLPD                       |
| Igk        | APC        | Dako            | polyclonal rabbit serum | C0222                          | 2.5              | PCD (cy)                     |
| Igk        | PacB       | Exbio           | A8B5                    | PB-504-T100                    | 4                | BCP-ALL                      |
| Igk        | PE         | Cytognos        | polyclonal              | CYT-SLPC-50                    | 20 (Part of LST) | LST, B-CLPD                  |
| Igλ        | APCC750    | Cytognos        | polyclonal              | CYT-LAC750                     | 3                | PCD (cy), BCP-ALL            |
| Igλ        | FITC       | Cytognos        | polyclonal              | CYT-SLPC-50                    | 20 (Part of LST) | LST, B-CLPD                  |
| Igμ        | FITC       | Dako            | polyclonal rabbit serum | F0058                          | 10               | BCP-ALL (cy)                 |
| IgM        | APC        | BD              | G20-127                 | 551062                         | 10               | BCP-ALL, B-CLPD              |
| cyMPO      | FITC       | Dako            | MPO-7                   | F0714                          | 3                | ALOT (cy)                    |
| NG2        | PE         | Beckman Coulter | 7.1                     | IM3454U                        | 10               | BCP-ALL, AML                 |
| Perforin   | FITC       | BD              | δG6                     | 556577                         | 10               | T-CLPD (cy),<br>NK-CLPD (cy) |
| TCL1       | APC        | eBioscience     | eBio1-21                | 17-6699                        | 2                | T-CLPD (cy)                  |
| TCRγδ      | PECy7      | BD              | 11F2                    | EU:<br>655410<br>US:<br>655434 | 3                | LST, B-CLPD                  |
| nuTdT      | FITC       | Dako            | HT-6                    | F7139                          | 10               | BCP-ALL (nu)                 |

APC – allophycocyanin, APC-H7 – allophycocyanin-Hilite 7, APCC750 – allophycocyanin-cyanine 750, FITC – fluorescein isothiocyanate, MPO – myeloperoxidase, PacB – Pacific Blue, PE – phycoerythrin, PECy7 – phycoerythrin-cyanine 7, PerCPCy5.5 – peridinin-chlorophyll-cyanine-5.5, PacO – Pacific Orange, TdT – terminal nucleotide transferase, cy – cytoplasmic antigen, nu –

nuclear antigen, \* a mixture of fluorochrome-conjugated and unconjugated antibodies was used to reduce the signal intensity, while retaining saturation conditions in order to avoid unpredictable variation in staining patterns

**Supplementary Table S2.** Absolute and relative percentage changes of particular cell populations, debris and doublets detectable in BM samples stained with ALOT tube at day 0 and after 24-hour storage.

| Case ID                                      | % at day 0 | % at +24h | % difference | Normalized % difference |
|----------------------------------------------|------------|-----------|--------------|-------------------------|
| Debris                                       |            |           |              |                         |
| LO-2568                                      | 2.1        | 2.9       | 0.8          | +38                     |
| LU-2584                                      | 1.2        | 2.9       | 1.7          | +142                    |
| MON-0139                                     | 0.2        | 0.2       | 0            | 0                       |
| PO-2570                                      | 0.6        | 0.3       | -0.3         | -50                     |
| RZ-2580                                      | 4.8        | 2.5       | -2.3         | -48                     |
| WR-2567                                      | 2.3        | 3.2       | 0.9          | +39                     |
| WR-2569                                      | 0.9        | 1.1       | 0.2          | +22                     |
| Mean ± SD [%]                                | 1.7 ± 1.6  | 1.9 ± 1.3 | N/A          |                         |
| Mean increase [%]                            | N/A        |           | 0.7          | +60                     |
| Mean decrease [%]                            |            |           | -1.3         | -49                     |
| Cell doublets                                |            |           |              |                         |
| LO-2568                                      | 2.3        | 2.6       | 0.3          | +13                     |
| LU-2584                                      | 2.6        | 15.9      | 13.3         | +512                    |
| MON-0139                                     | 3.6        | 3.3       | -0.3         | -8                      |
| PO-2570                                      | 13.1       | 20.7      | 7.6          | +58                     |
| RZ-2580                                      | 3.4        | 4.9       | 1.5          | +44                     |
| WR-2567                                      | 6.2        | 3.5       | -2.7         | -44                     |
| WR-2569                                      | 5.6        | 4.1       | -1.5         | -27                     |
| Mean ± SD [%]                                | 5.3 ± 3.8  | 7.9 ± 7.3 | N/A          |                         |
| Mean increase [%]                            | N/A        |           | 3.1          | +51                     |
| Mean decrease [%]                            |            |           | -1.5         | -35                     |
| Unspecific staining with APC-H7 fluorochrome |            |           |              |                         |
| LO-2568                                      | 0.5        | 1.2       | 0.7          | +140                    |
| LU-2584                                      | 1.0        | 4.2       | 3.2          | +320                    |

|                   |            |           |       |       |
|-------------------|------------|-----------|-------|-------|
| MON-0139          | 0.3        | 0.4       | 0.1   | +33   |
| PO-2570           | 0.1        | 6.9       | 6.8   | +6800 |
| RZ-2580           | 0.6        | 13.4      | 12.8  | +2133 |
| WR-2567           | 0.8        | 1.6       | 0.8   | +100  |
| WR-2569           | 0.1        | 0.1       | 0     | 0     |
| Mean ± SD [%]     | 0.5 ± 0.3  | 4.0 ± 4.8 | N/A   |       |
| Mean increase [%] | N/A        |           | 1.2   | +148  |
| Mean decrease [%] |            |           | N/A   | N/A   |
| Blasts            |            |           |       |       |
| LO-2568           | 85.4       | 84.1      | -1.3  | -2    |
| LU-2584           | 76.7       | 63.2      | -13.5 | -18   |
| MON-0139          | 88.1       | 88.3      | 0.2   | 0     |
| PO-2570           | 82.9       | 75.2      | -7.7  | -9    |
| RZ-2580           | 77.9       | 76.6      | -1.3  | -2    |
| WR-2567           | 80.7       | 85.1      | 4.4   | +5    |
| WR-2569           | 85.8       | 88.4      | 2.6   | +3    |
| Mean ± SD [%]     | 83.5 ± 3.8 | 83.0 ±5.7 | N/A   |       |
| Mean increase [%] | N/A        |           | 2.4   | N/A   |
| Mean decrease [%] |            |           | -3.4  | N/A   |
| Neutrophils       |            |           |       |       |
| LO-2568           | 0.8        | 0.8       | 0     | 0     |
| LU-2584           | 3.7        | 3.8       | 0.1   | +3    |
| MON-0139          | 0.4        | 0.4       | 0     | 0     |
| PO-2570           | 2.4        | 2.8       | 0.4   | +17   |
| RZ-2580           | 4.3        | 5.6       | 1.3   | +30   |
| WR-2567           | 0.2        | 0.3       | 0.1   | +50   |
| WR-2569           | 0.6        | 0.6       | 0     | 0     |
| Mean ± SD [%]     | 1.8 ± 1.7  | 2.0 ±2.0  | N/A   |       |
| Mean increase [%] | N/A        |           | 0.3   | +30   |
| Mean decrease [%] |            |           | N/A   | N/A   |
| B-cells           |            |           |       |       |
| LO-2568           | 1.7        | 1.7       | 0     | 0     |
| LU-2584           | 2.1        | 1.6       | -0.5  | -24   |
| MON-0139          | 1.2        | 1.3       | 0.1   | +8    |
| PO-2570           | 0.1        | 0.1       | 0     | 0     |



|                   |           |          |      |     |
|-------------------|-----------|----------|------|-----|
| RZ-2580           | 2.7       | 2.2      | -0.5 | -19 |
| WR-2567           | 1.7       | 0.6      | -1.1 | -65 |
| WR-2569           | 1.7       | 1.2      | -0.5 | -29 |
| Mean ± SD [%]     | 1.6 ± 0.8 | 1.2 ±0.7 | N/A  |     |
| Mean increase [%] | N/A       |          | 0.1  | N/A |
| Mean decrease [%] |           |          | -0.5 | -34 |
| T-cells           |           |          |      |     |
| LO-2568           | 6.3       | 6.5      | 0.2  | +3  |
| LU-2584           | 8.3       | 7.2      | -1.1 | -13 |
| MON-0139          | 5.7       | 5.8      | 0.1  | +2  |
| PO-2570           | 0.8       | 0.9      | 0.1  | +13 |
| RZ-2580           | 4.3       | 4.9      | 0.6  | +14 |
| WR-2567           | 8.3       | 6.3      | -2.0 | -24 |
| WR-2569           | 3.2       | 3.0      | -0.2 | -6  |
| Mean ± SD [%]     | 5.3 ± 2.0 | 4.9 ±2.2 | N/A  |     |
| Mean increase [%] | N/A       |          | 0.2  | N/A |
| Mean decrease [%] |           |          | -1.1 | -24 |
| NK-cells          |           |          |      |     |
| LO-2568           | 0.8       | 0.8      | 0    | 0   |
| LU-2584           | 2.6       | 2.5      | -0.1 | -4  |
| MON-0139          | 0.6       | 0.5      | -0.1 | -17 |
| PO-2570           | 0.2       | 0.1      | -0.1 | -50 |
| RZ-2580           | 0.5       | 0.5      | 0    | 0   |
| WR-2567           | 0.4       | 0.3      | -0.1 | -25 |
| WR-2569           | 0.9       | 0.9      | 0    | 0   |
| Mean ± SD [%]     | 0.9 ± 0.8 | 0.8 ±1.1 | N/A  |     |
| Mean increase [%] | N/A       |          | N/A  | N/A |
| Mean decrease [%] |           |          | -0.1 | -37 |

N/A – not applicable; normalized % difference calculated as [(+24h-day 0)/(day 0)]x100 [%]

**Supplementary Table S3.** Ratios of percentage of debris, doublets and pathological/clonal B-cells in particular BM and PB samples stained with LST tube at different time points.

| Case ID       | % at 0h   | % at 3h   | % at 24h  | % at (24h+3h) | % difference 3h vs 0h | % difference 24h vs 0h | % difference (24h+3h) vs 24h | Normalized % difference 3h vs 0h | Normalized % difference 24h vs 0h | Normalized % difference (24h+3h) vs 24h |
|---------------|-----------|-----------|-----------|---------------|-----------------------|------------------------|------------------------------|----------------------------------|-----------------------------------|-----------------------------------------|
| Debris        |           |           |           |               |                       |                        |                              |                                  |                                   |                                         |
| 34343         | 3.6       | 3.9       | 1.5       | 1.5           | 0.3                   | -2.1                   | 0                            | +8                               | -58                               | 0                                       |
| 34344         | 0.2       | 0.2       | 0.7       | 3.7           | 0                     | 0.5                    | 3.0                          | 0                                | +250                              | +429                                    |
| 34345         | 9.5       | 8.5       | 11.7      | 8.6           | -1.0                  | 2.2                    | -3.1                         | -11                              | +23                               | -26                                     |
| 34346         | 0.3       | 0.2       | 0.6       | 0.3           | -0.1                  | 0.3                    | -0.3                         | -33                              | +100                              | -50                                     |
| 34419         | 3.1       | 1.4       | 5.5       | 4.6           | -1.7                  | 2.4                    | -0.9                         | -55                              | +77                               | -16                                     |
| 34420         | 0.8       | 0.4       | 1.6       | 1.7           | -0.4                  | 0.8                    | 0.1                          | -50                              | +100                              | +6                                      |
| 34457         | 1.1       | 1.4       | 2.9       | 1.8           | 0.3                   | 1.8                    | -1.1                         | +27                              | +164                              | -38                                     |
| 001           | 0.7       | 0.6       | 3.8       | 3.5           | -0.1                  | 3.1                    | -0.3                         | -14                              | +443                              | -8                                      |
| 002           | 0.7       | N/A       | 0.7       | N/A           |                       | 0                      |                              |                                  | 0                                 |                                         |
| 003           | 1.7       | N/A       | 1.5       | N/A           |                       | -0.2                   |                              |                                  | -12                               |                                         |
| 004           | 0.1       | N/A       | 0.1       | N/A           |                       | 0                      |                              |                                  | 0                                 |                                         |
| 005           | 4.4       | N/A       | 3.9       | N/A           |                       | -0.5                   |                              |                                  | -11                               |                                         |
| 006           | 0.6       | 0.6       | N/A       | N/A           | 0                     |                        |                              | 0                                |                                   |                                         |
| Mean ± SD [%] | 2.0 ± 2.6 | 1.9 ± 2.7 | 2.9 ± 3.2 | 3.2 ± 2.6     | N/A                   |                        |                              |                                  |                                   |                                         |

|                                        |           |           |           |           |             |             |             |            |             |             |
|----------------------------------------|-----------|-----------|-----------|-----------|-------------|-------------|-------------|------------|-------------|-------------|
| Mean increase [%]<br>Mean decrease [%] | N/A       |           |           |           | 0.3<br>-0.7 | 1.6<br>-0.9 | 1.6<br>-1.1 | +18<br>-33 | +165<br>-27 | +217<br>-28 |
| Cell doublets                          |           |           |           |           |             |             |             |            |             |             |
| 34343                                  | 3.0       | 2.7       | 2.8       | 2.3       | -0.3        | -0.2        | -0.5        | -10        | -7          | -18         |
| 34344                                  | 7.3       | 5.8       | 8.3       | 6.2       | -1.5        | 1.0         | -2.1        | -21        | +14         | -25         |
| 34345                                  | 2.1       | 2.4       | 2.0       | 2.7       | 0.3         | -0.1        | 0.7         | +14        | -5          | +35         |
| 34346                                  | 7.0       | 6.5       | 8.2       | 7.8       | -0.5        | 1.2         | -0.4        | -7         | +17         | -6          |
| 34419                                  | 1.7       | 1.1       | 2.1       | 1.7       | -0.6        | 0.4         | -0.4        | -35        | +24         | -19         |
| 34420                                  | 1.3       | 1.5       | 2.2       | 2.7       | 0.2         | 0.9         | 0.5         | +15        | +69         | +23         |
| 34457                                  | 2.4       | 2.5       | 2.3       | 2.6       | 0.1         | -0.1        | 0.3         | +4         | -4          | +13         |
| 001                                    | 4.7       | 5.1       | 3.0       | 5.4       | 0.4         | -1.7        | 2.4         | +9         | -36         | +80         |
| 002                                    | 1.9       | N/A       | 1.8       | N/A       |             | -0.1        |             |            | -5          |             |
| 003                                    | 8.0       | N/A       | 2.5       | N/A       |             | -5.5        |             |            | -69         |             |
| 004                                    | 5.4       | N/A       | 4.6       | N/A       |             | -0.8        |             |            | -15         |             |
| 005                                    | 4.3       | N/A       | 2.9       | N/A       |             | -1.4        |             |            | -33         |             |
| 006                                    | 5.0       | 4.1       | N/A       | N/A       | -0.9        |             |             | -18        |             |             |
| Mean ± SD [%]                          | 4.2 ± 2.3 | 3.5 ± 1.9 | 3.6 ± 2.3 | 4.0 ± 2.2 | N/A         |             |             |            |             |             |
| Mean increase [%]<br>Mean decrease [%] | N/A       |           |           |           | 0.3<br>-0.7 | 0.9<br>-1.2 | 1.0<br>-0.9 | +11<br>-18 | +31<br>-22  | +38<br>-41  |

| Pathological / clonal B-cells |             |             |             |             |      |       |      |     |     |     |
|-------------------------------|-------------|-------------|-------------|-------------|------|-------|------|-----|-----|-----|
| 34343                         | 6.9         | 6.9         | 5.4         | 6.0         | 0.0  | -1.5  | 0.6  | 0   | -22 | +12 |
| 34344                         | 84.8        | 86.7        | 84.7        | 83.7        | 1.9  | -0.1  | -1.0 | +2  | 0   | -1  |
| 34345                         | 17.8        | 18.3        | 19.0        | 19.8        | 0.5  | 1.2   | 0.8  | +3  | +7  | +4  |
| 34346                         | 86.4        | 86.9        | 85.4        | 85.7        | 0.5  | -1.0  | 0.3  | +1  | -1  | 0   |
| 34419                         | 3.4         | 4.0         | 3.8         | 4.1         | 0.6  | 0.4   | 0.3  | +18 | +12 | +10 |
| 34420                         | 40.6        | 43.4        | 44.6        | 45.6        | 2.8  | 4.0   | 1.0  | +7  | +10 | +2  |
| 34457                         | 24.2        | 24.0        | 23.3        | 23.3        | -0.2 | -0.9  | 0    | -1  | -4  | 0   |
| 001                           | 72.1        | 72.1        | 50.9        | 50.6        | 0.0  | -21.2 | -0.3 | 0   | -29 | -1  |
| 002                           | 70.0        | N/A         | 67.7        | N/A         |      | -2.3  |      |     | -3  |     |
| 003                           | 81.2        | N/A         | 81.8        | N/A         |      | 0.6   |      |     | +1  |     |
| 004                           | 83.4        | N/A         | 79.6        | N/A         |      | -3.8  |      |     | -5  |     |
| 005                           | 56.7        | N/A         | 62.4        | N/A         |      | 5.7   |      |     | +10 |     |
| 006                           | 81.5        | 82.3        | N/A         | N/A         | 0.8  |       |      | +1  |     |     |
| Mean ± SD [%]                 | 54.5 ± 31.8 | 47.2 ± 35.1 | 50.7 ± 31.1 | 39.9 ± 32.2 | N/A  |       |      |     |     |     |
| Mean increase [%]             | N/A         |             |             |             | 1.0  | 2.4   | 0.6  | +5  | +8  | +6  |
| Mean decrease [%]             |             |             |             |             | -0.2 | -4.4  | -0.6 | -1  | -11 | -1  |

N/A – not applicable; normalized % difference 3h vs 0h calculated as  $[(3h-0h)/0h] \times 100$  [%]; normalized % difference 24h vs 0h calculated as  $[(24h-0h)/0h] \times 100$  [%]; normalized % difference (24h+3h) vs 24h calculated as  $[(24h+3h)-24h]/24h \times 100$  [%]

**Supplementary Table S4.** Ratios of percentage of debris, doublets and pathological/clonal B-cells in particular BM and PB samples stained with the 1<sup>st</sup> tube of B-CLPD panel at different time points.

| Case ID           | % at 0h   | % at 3h   | % at 24h  | % at (24h+3h) | % difference 3h vs 0h | % difference 24h vs 0h | % difference (24h+3h) vs 24h | Normalized % difference 3h vs 0h | Normalized % difference 24h vs 0h | Normalized % difference (24h+3h) vs 24h |
|-------------------|-----------|-----------|-----------|---------------|-----------------------|------------------------|------------------------------|----------------------------------|-----------------------------------|-----------------------------------------|
| Debris            |           |           |           |               |                       |                        |                              |                                  |                                   |                                         |
| 001               | 9.2       | 8.1       | 6.9       | 7.2           | -1.1                  | -2.3                   | 0.3                          | -12                              | -25                               | +4                                      |
| 003               | 2.4       | N/A       | 2.8       | 2.2           |                       | 0.4                    | -0.6                         |                                  | +17                               | -21                                     |
| 005               | 1.1       | 0.9       | 0.8       | 0.9           | -0.2                  | -0.3                   | 0.1                          | -18                              | -27                               | +13                                     |
| 006               | 1.3       | N/A       | 1.0       | 0.9           |                       | -0.3                   | -0.1                         |                                  | -23                               | -10                                     |
| 007               | 1.8       | N/A       | 2.1       | 0.8           |                       | 0.3                    | -1.3                         |                                  | +17                               | -62                                     |
| 008               | 21.0      | 1.6       | 3.8       | 3.1           | -19.4                 | -17.2                  | -0.7                         | -92                              | -82                               | -18                                     |
| Mean ± SD [%]     | 6.1 ± 7.9 | 3.5 ± 4.0 | 2.9 ± 2.3 | 2.5 ± 2.5     | N/A                   |                        |                              |                                  |                                   |                                         |
| Mean increase [%] | N/A       |           |           |               | N/A                   | 0.4                    | 0.2                          | N/A                              | +17                               | +8                                      |
| Mean decrease [%] |           |           |           |               | -7.0                  | -5.0                   | -0.7                         | -41                              | -39                               | -28                                     |
| Cell doublets     |           |           |           |               |                       |                        |                              |                                  |                                   |                                         |
| 001               | 5.3       | 4.0       | 2.8       | 3.1           | -1.3                  | -2.5                   | 0.3                          | -25                              | -47                               | +11                                     |
| 003               | 4.7       | N/A       | 5.3       | 7.3           |                       | 0.6                    | 2.0                          |                                  | +13                               | +38                                     |
| 005               | 7.1       | 4.3       | 3.7       | 2.8           | -2.8                  | -3.4                   | -0.9                         | -39                              | -48                               | -24                                     |

|                               |             |             |             |             |      |      |      |     |      |     |
|-------------------------------|-------------|-------------|-------------|-------------|------|------|------|-----|------|-----|
| 006                           | 4.8         | N/A         | 3.9         | 2.4         |      | -0.9 | -1.5 |     | -19  | -38 |
| 007                           | 3.3         | N/A         | 7.6         | 5.7         |      | 4.3  | -1.9 |     | +130 | -25 |
| 008                           | 7.8         | 4.9         | 16.6        | 8.9         | -3.0 | 8.8  | -7.7 | -37 | +113 | -46 |
| Mean ± SD [%]                 | 5.5 ± 1.7   | 4.4 ± 0.5   | 6.7 ± 5.2   | 5.0 ± 2.7   | N/A  |      |      |     |      |     |
| Mean increase [%]             | N/A         |             |             |             | N/A  | 4.6  | 1.2  | N/A | +85  | +24 |
| Mean decrease [%]             |             |             |             |             | -2.3 | -2.3 | -3.0 | -34 | -38  | -34 |
| Pathological / clonal B-cells |             |             |             |             |      |      |      |     |      |     |
| 001                           | 13.1        | 13.4        | 13.1        | 13.9        | 0.3  | 0    | 0.8  | +2  | 0    | +6  |
| 003                           | 75.4        | 78.1        | 71.3        | 76.8        | 2.7  | -4.1 | 5.5  | +4  | -5   | +8  |
| 005                           | 70.7        | N/A         | 83.1        | 75.3        |      | 12.4 | -7.8 |     | +18  | -9  |
| 006                           | 77.2        | N/A         | 74.6        | 78.3        |      | -2.6 | 3.7  |     | -3   | +5  |
| 007                           | 27.2        | N/A         | 31.7        | 29.3        |      | 4.5  | -2.4 |     | +17  | -8  |
| 008                           | 52.1        | 81.3        | 44.2        | 71.2        | 29.2 | -7.9 | 27.0 | +56 | -15  | +61 |
| Mean ± SD [%]                 | 52.6 ± 27.0 | 57.6 ± 38.3 | 53.0 ± 27.7 | 57.5 ± 28.3 | N/A  |      |      |     |      |     |
| Mean increase [%]             | N/A         |             |             |             | 10.7 | 8.5  | 9.3  | +21 | +18  | +20 |
| Mean decrease [%]             |             |             |             |             | N/A  | -4.9 | -5.1 | N/A | -8   | -9  |

N/A – not applicable; N/A – not applicable; normalized % difference 3h vs 0h calculated as  $[(3h-0h)/0h] \times 100$  [%]; normalized % difference 24h vs 0h calculated as  $[(24h-0h)/0h] \times 100$  [%]; normalized % difference (24h+3h) vs 24h calculated as  $[(24h+3h)-24h]/24h \times 100$  [%]

**Supplementary Table S5.** Ratios of percentage of debris, doublets and pathological/clonal plasma cells in particular BM and PB samples stained with PCD panel at different time points.

| Case ID       | % at 0h           | % at 3h   | % at 24h          | % at (24h+3h)     | % difference 3h vs 0h | % difference 24h vs 0h | % difference (24h+3h) vs 24h | Normalized % difference 3h vs 0h | Normalized % difference 24h vs 0h | Normalized % difference (24h+3h) vs 24h |
|---------------|-------------------|-----------|-------------------|-------------------|-----------------------|------------------------|------------------------------|----------------------------------|-----------------------------------|-----------------------------------------|
| Debris        |                   |           |                   |                   |                       |                        |                              |                                  |                                   |                                         |
| BM1           | 3.1               | 2.9       | 7.2               | 4.3               | -0.2                  | 4.1                    | -2.9                         | -6                               | +132                              | -40                                     |
| BM2           | 3.3               | 3.1       | 5.4               | 4.4               | -0.2                  | 2.1                    | -1.0                         | -6                               | +64                               | -19                                     |
| BM3           | 3.4               | 3.4       | 6.8               | 4.9               | 0                     | 3.4                    | -1.9                         | 0                                | +100                              | -28                                     |
| BM4           | 3.6               | 4.1       | 8.3               | 4.8               | 0.5                   | 4.7                    | -3.5                         | +14                              | +131                              | -42                                     |
| BM5           | 8.9               | 8.4       | 12.7              | 7.6               | -0.5                  | 3.8                    | -5.1                         | -6                               | +43                               | -40                                     |
| pat 001       | 0.05              | 0.05      | 0.08              | 0.06              | 0                     | 0.03                   | -0.02                        | 0                                | 0                                 | 0                                       |
| pat 005       | 0.01              | N/A       | 0.06              | 0.06              |                       | 0.05                   | 0                            |                                  | 0                                 | 0                                       |
| pat 006       | 28.0 <sup>†</sup> | N/A       | 37.3 <sup>†</sup> | 26.3 <sup>†</sup> |                       | 9.3                    | -11.0                        |                                  | +33                               | -29                                     |
| pat 007       | 2.5               | N/A       | 20.0              | 2.3               |                       | 17.5                   | -17.7                        |                                  | +700                              | -88                                     |
| Mean ± SD [%] | 3.1 ± 2.8         | 3.7 ± 2.7 | 7.6 ± 6.5         | 3.6 ± 2.6         | N/A                   |                        |                              |                                  |                                   |                                         |

|                                        |           |           |           |           |             |             |             |             |             |            |
|----------------------------------------|-----------|-----------|-----------|-----------|-------------|-------------|-------------|-------------|-------------|------------|
| Mean increase [%]<br>Mean decrease [%] | N/A       |           |           |           | 0.5<br>-0.3 | 4.6<br>N/A  | N/A<br>-4.2 | +14<br>-6.0 | +172<br>N/A | N/A<br>-41 |
| Cell doublets                          |           |           |           |           |             |             |             |             |             |            |
| BM1                                    | 3.0       | 3.2       | 5.0       | 6.7       | 0.2         | 2.0         | 1.7         | +7          | +67         | +34        |
| BM2                                    | 3.5       | 3.6       | 6.2       | 4.3       | 0.1         | 2.7         | -1.9        | +3          | +77         | -31        |
| BM3                                    | 22.7      | 7.5       | 9.8       | 5.7       | -15.2       | -12.9       | -4.1        | -67         | -57         | -42        |
| BM4                                    | 4.2       | 7.9       | 8.4       | 10.4      | 3.7         | 4.2         | 2.0         | +88         | +100        | +24        |
| BM5                                    | 6.1       | 8.2       | 11.2      | 15.8      | 2.1         | 5.1         | 4.6         | +34         | +84         | +41        |
| pat 001                                | 2.9       | 2.7       | 2.3       | 2         | -0.2        | -0.6        | -0.3        | -7          | -21         | -13        |
| pat 005                                | 4.6       |           | 5.2       | 4.9       |             | 0.6         | -0.3        |             | +13         | -6         |
| pat 006                                | 10.4      |           | 2.5       | 1.9       |             | -7.9        | -0.6        |             | -76         | -24        |
| pat 007                                | 4.5       |           | 6.0       | 6.4       |             | 1.5         | 0.4         |             | +33         | +7         |
| Mean ± SD [%]                          | 4.9 ± 2.4 | 6.9 ± 6.4 | 6.3 ± 3.0 | 6.5 ± 4.3 | N/A         |             |             |             |             |            |
| Mean increase [%]<br>Mean decrease [%] | N/A       |           |           |           | 1.5<br>-0.2 | 2.7<br>-0.6 | 2.2<br>-1.4 | +33<br>-37  | +62<br>-51  | +26<br>-23 |
| Pathological / clonal plasma cells     |           |           |           |           |             |             |             |             |             |            |
| BM1                                    | 0.2       | 0.2       | 0.3       | 0.3       | 0           | 0.1         | 0           | -2          | +11         | +6         |



|                   |                   |                   |                   |                   |      |      |      |     |     |     |
|-------------------|-------------------|-------------------|-------------------|-------------------|------|------|------|-----|-----|-----|
| BM2               | N/A               | N/A               | N/A               | N/A               |      |      |      |     |     |     |
| BM3               | 11.7 <sup>†</sup> | 14.1 <sup>†</sup> | 12.4 <sup>†</sup> | 13.4 <sup>†</sup> | 2.4  | 0.7  | 1.0  | +20 | +6  | +8  |
| BM4               | 0.9               | 0.8               | 0.8               | 0.8               | -0.1 | -0.1 | 0    | -14 | -14 | 0   |
| BM5               | 0.8               | 0.8               | 0.7               | 0.7               | 0    | -0.1 | 0    | +5  | -14 | +5  |
| pat 001           | 0.3               | 0.3               | 0.3               | 0.3               | 0    | 0    | 0    | -3  | -3  | +7  |
| pat 005           | 0.8               | N/A               | 0.7               | 0.6               |      | -0.1 | -0.1 |     | -19 | -5  |
| pat 006           | 0.1               | N/A               | 0.1               | 0.1               |      | 0    | 0    |     | 0   | 0   |
| pat 007           | 2.0               | N/A               | 1.4               | 1.3               |      | -0.6 | -0.1 |     | -29 | -11 |
| Mean ± SD [%]     | 0.7 ± 0.7         | 0.5 ± 0.3         | 0.6 ± 0.4         | 0.6 ± 0.4         | N/A  |      |      |     |     |     |
| Mean increase [%] | N/A               |                   |                   |                   | 2.4  | 0.7  | 1.0  | +21 | +28 | +8  |
| Mean decrease [%] |                   |                   |                   |                   | -0.1 | -0.2 | -0.1 | -11 | -17 | -11 |

<sup>†</sup> outlier results, N/A – not applicable; N/A – not applicable; normalized % difference 3h vs 0h calculated as [(3h-0h)/0h]x100 [%]; normalized % difference 24h vs 0h calculated as [(24h-0h)/0h]x100 [%]; normalized % difference (24h+3h) vs 24h calculated as [((24h+3h)-24h)/24h]x100 [%]

**Supplementary Table S6.** MFI values of LST markers evaluated on relevant cell populations obtained at different pH and BSA concentrations.

|                          |          | pH / BSA concentration [%] |           |           |           |           |           |           |           |
|--------------------------|----------|----------------------------|-----------|-----------|-----------|-----------|-----------|-----------|-----------|
| Cell population / marker |          | 7.2 / 0.2                  | 7.2 / 0.5 | 7.4 / 0.2 | 7.4 / 0.5 | 7.6 / 0.2 | 7.6 / 0.5 | 7.8 / 0.2 | 7.8 / 0.5 |
| B-cells                  |          |                            |           |           |           |           |           |           |           |
| CD19                     | Mean MFI | 18307                      | 18415     | 18188     | 17918     | 18145     | 18018     | 17894     | 17954     |
|                          | SD       | 1996                       | 2196      | 2162      | 2021      | 2339      | 2084      | 2153      | 2100      |
| CD20                     | Mean MFI | 25082                      | 23910     | 25292     | 24411     | 24161     | 24351     | 23860     | 24368     |
|                          | SD       | 4187                       | 4104      | 4265      | 4081      | 4732      | 3756      | 5174      | 4400      |
| IgKappa                  | Mean MFI | 20322                      | 18817     | 18308     | 18123     | 18501     | 18811     | 20247     | 18545     |
|                          | SD       | 16180                      | 13707     | 15359     | 15530     | 14198     | 15232     | 14861     | 13289     |
| IgLambda                 | Mean MFI | 14040                      | 14181     | 15214     | 14505     | 16282     | 14323     | 16542     | 14021     |
|                          | SD       | 4939                       | 4017      | 3859      | 4037      | 4196      | 5233      | 4374      | 5599      |
| T cells                  |          |                            |           |           |           |           |           |           |           |
| CD3                      | Mean MFI | 37391                      | 38892     | 38472     | 39413     | 38672     | 38847     | 38547     | 38408     |
|                          | SD       | 7681                       | 4222      | 5098      | 3769      | 3606      | 4107      | 3537      | 4076      |
| CD5                      | Mean MFI | 9916                       | 9815      | 9852      | 9865      | 9837      | 9796      | 9758      | 9685      |
|                          | SD       | 2213                       | 2193      | 2227      | 2225      | 2261      | 2223      | 2162      | 2112      |
| CD4                      | Mean MFI | 7111                       | 6941      | 7105      | 6996      | 6859      | 6899      | 6795      | 6759      |
|                          | SD       | 1933                       | 1857      | 1886      | 1873      | 1851      | 1935      | 1849      | 1852      |
| CD8                      | Mean MFI | 15895                      | 15585     | 16579     | 16369     | 17092     | 17068     | 17690     | 17367     |
|                          | SD       | 3389                       | 3341      | 3643      | 3856      | 3881      | 4006      | 4159      | 4460      |
| CD45                     | Mean MFI | 6970                       | 7068      | 7101      | 7101      | 7035      | 7075      | 7064      | 7030      |
|                          | SD       | 837                        | 869       | 804       | 866       | 842       | 890       | 835       | 891       |
| NK cells                 |          |                            |           |           |           |           |           |           |           |
|                          | Mean MFI | 8603                       | 7970      | 8172      | 8135      | 7956      | 7857      | 7837      | 7664      |
|                          | SD       | 2307                       | 2069      | 2172      | 1903      | 2238      | 2329      | 1418      | 2093      |
| Monocytes                |          |                            |           |           |           |           |           |           |           |
| CD38                     | Mean MFI | 2584                       | 2459      | 2562      | 2549      | 2505      | 2533      | 2451      | 2456      |
|                          | SD       | 352                        | 367       | 354       | 364       | 329       | 341       | 339       | 349       |

**Supplementary Table S7.** Expression of markers on relevant PB cell populations stained with LST tube at different pH on averaging the results for different BSA concentrations.

|                  | Mean MFI of marker on relevant cell population at |              |              |              | higher MFI at higher pH | lower MFI at higher pH |
|------------------|---------------------------------------------------|--------------|--------------|--------------|-------------------------|------------------------|
|                  | pH = 7.2                                          | pH = 7.4     | pH = 7.6     | pH = 7.8     |                         |                        |
| B-cells          |                                                   |              |              |              |                         |                        |
| Igλ (n=15)       | 14111                                             | 14860        | <b>15303</b> | 15282        | 1 (7%)<br>[+44%]        | 0                      |
| Igκ (n=10)       | <b>19570</b>                                      | 18216        | 18656        | 19396        | 3 (30%)<br>[+73%]       | 0                      |
| CD19 (n=15)      | <b>18530</b>                                      | 18226        | 18262        | 18082        | 0                       | 0                      |
| CD20 (n=15)      | 24496                                             | <b>24852</b> | 24256        | 24114        | 0                       | 0                      |
| T-cells          |                                                   |              |              |              |                         |                        |
| CD4 (n=15)       | 7026                                              | <b>7051</b>  | 6879         | 6777         | 0                       | 0                      |
| CD8 (n=15)       | 15740                                             | 16474        | 17080        | <b>17528</b> | 0                       | 0                      |
| CD45 (n=15)      | 7019                                              | <b>7100</b>  | 7055         | 7047         | 0                       | 0                      |
| CD5 (n=15)       | <b>9866</b>                                       | 9858         | 9817         | 9722         | 0                       | 0                      |
| CD3 (n=15)       | 38142                                             | <b>38942</b> | 38760        | 38478        | 0                       | 0                      |
| NK-cells         |                                                   |              |              |              |                         |                        |
| CD56 (n=15)      | <b>8286</b>                                       | 8153         | 7906         | 7750         | 0                       | 0                      |
| Monocytes (n=15) |                                                   |              |              |              |                         |                        |
| CD38 (n=10)      | 2522                                              | <b>2556</b>  | 2519         | 2454         | 0                       | 0                      |

For each antigen, modal pH values were determined at which the lowest and the highest (i.e., extreme) MFI was observed at every pH condition. Thus, each antigen was assigned 2 pH values at which the minimal and maximal MFI values were observed. Results expressed as number (percentage) of cases with significant (i.e., beyond the tolerance range of  $\pm 30\%$ ) MFI ratio between extreme pH values. Percentages in square brackets indicate mean relative percentage change in MFI; n indicates number of cases positive/evaluated for given antigen. The maximal mean MFI values at respective pH were marked in bold.

**Supplementary Table S8.** Selected additional markers included in the EuroFlow leukemia/lymphoma panels that were not directly investigated in the current study and that may be influenced by sample preparation-associated variables.

| Marker                                                       | Variables with possible influence                                                                                     | References |
|--------------------------------------------------------------|-----------------------------------------------------------------------------------------------------------------------|------------|
| CD16                                                         | The expression level decreases on granulocytes in samples stored for >24h                                             | [28]       |
| CD4<br>CD13<br>CD33<br>CD34<br>CD38<br>CD45<br>CD71<br>CD117 | The expression levels vary on different cell types between EDTA- and heparin anticoagulated samples                   | [31]       |
| CD138                                                        | The expression level diminishes on PC in samples stored for >24h at 25°C; the effect more visible when stored at 4°C; | [37]       |
|                                                              | The expression level on PC is decreased in heparin- vs. EDTA- anticoagulated samples                                  | [30]       |
| CD229                                                        | The expression level increases after storage at 25°C for 72h                                                          | [37]       |
| PC - plasma cells                                            |                                                                                                                       |            |
